# Supplementary material
Source: ML conference proceedings conference paper supplement (https://openreview.net/forum?id=NIhRwzqhUz)
Supplement: supplementary_material [file attachment]

# 1 EXAMPLE TSP TOURS

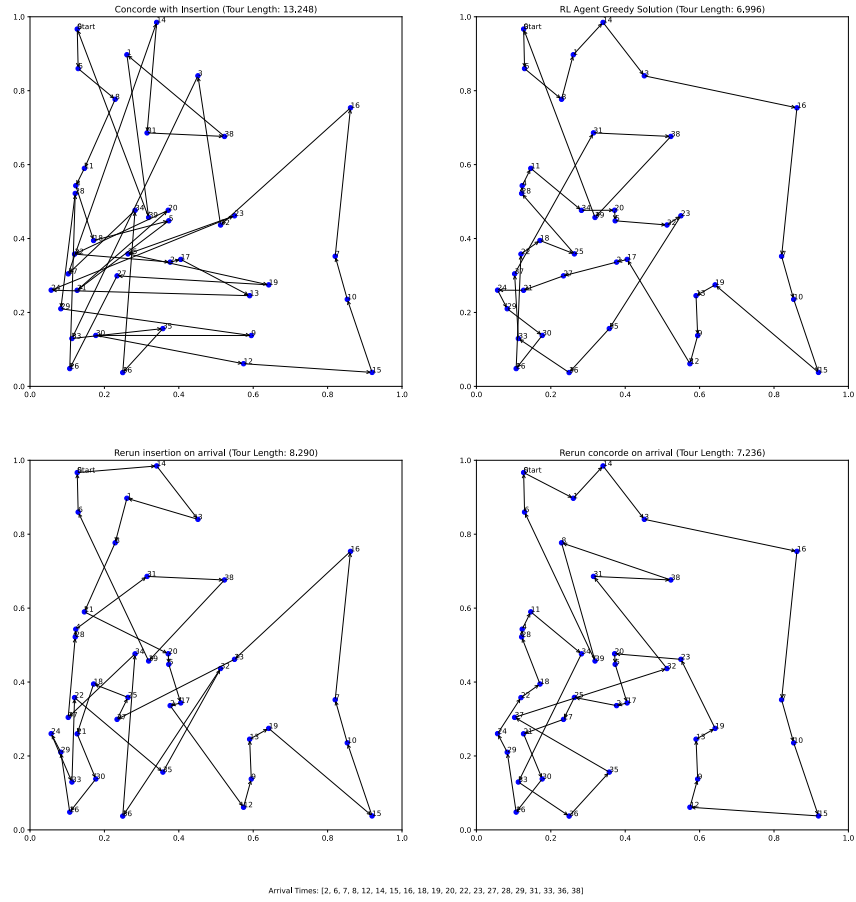

Figure 1: 20 static vertices, 20 dynamic vertices, unimodal Distribution.

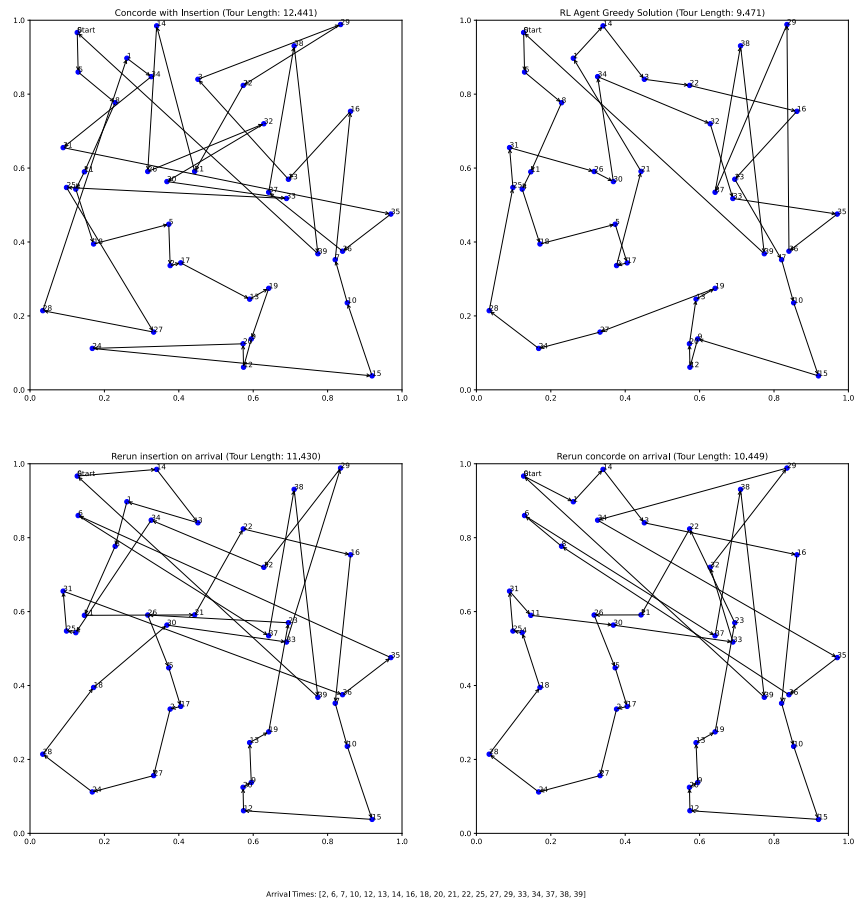

Figure 2: 20 static vertices, 20 dynamic vertices, bimodal Distribution.

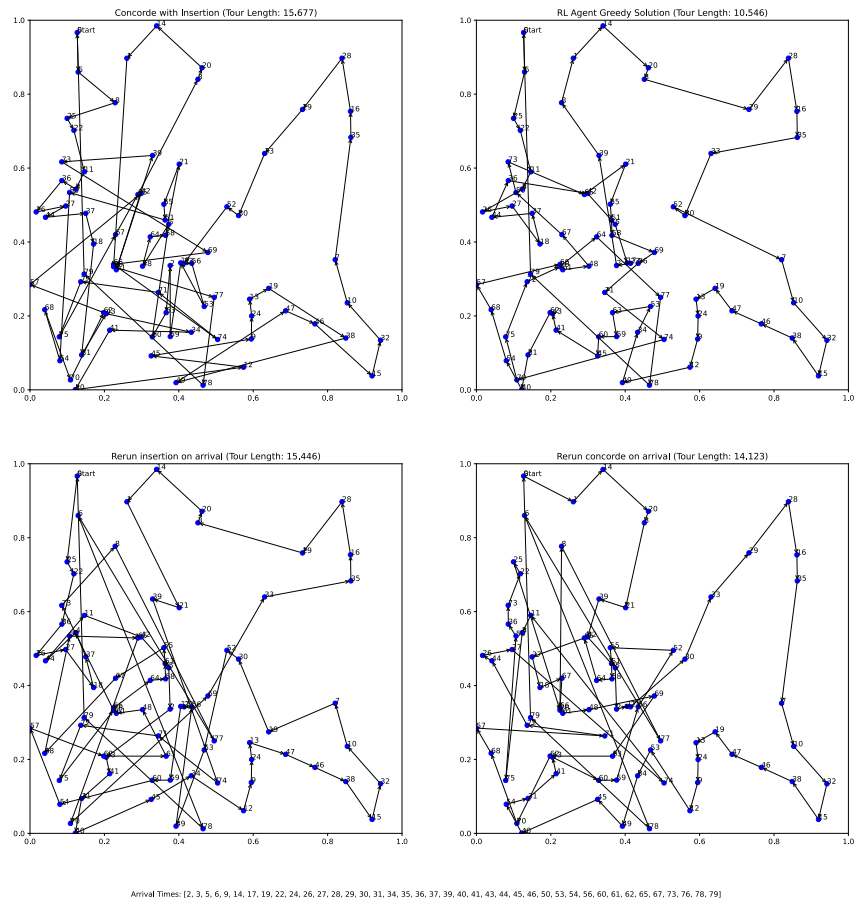

Figure 3: 40 static vertices, 40 dynamic vertices, unimodal Distribution.

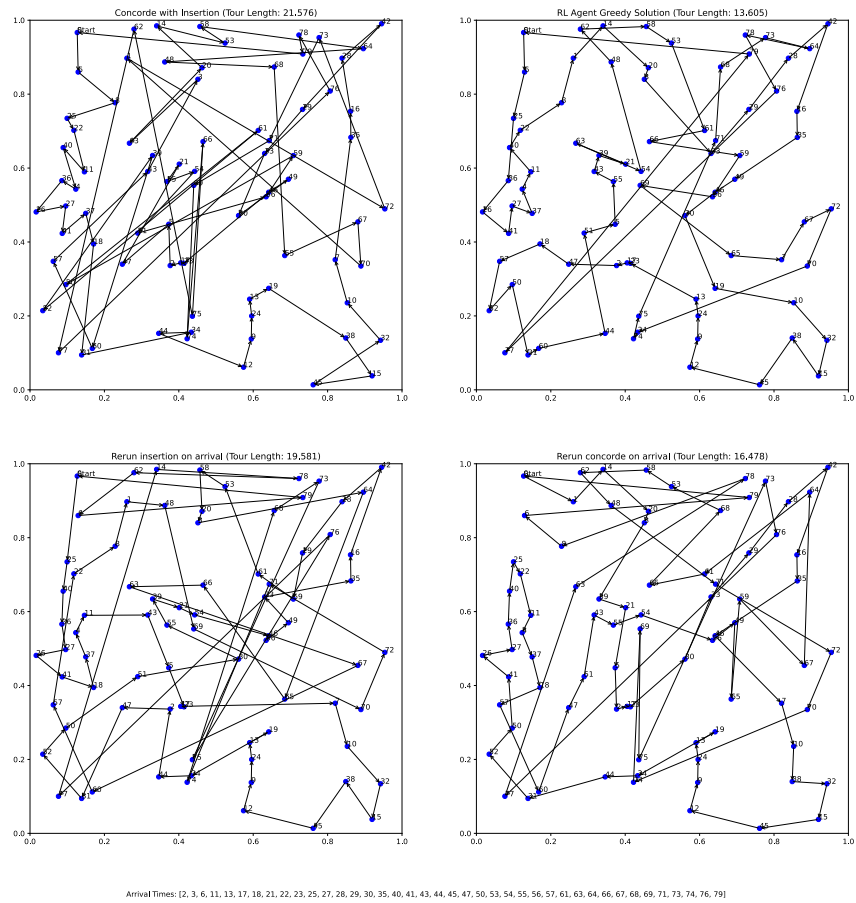

Figure 4: 40 static vertices, 40 dynamic vertices, bimodal Distribution.

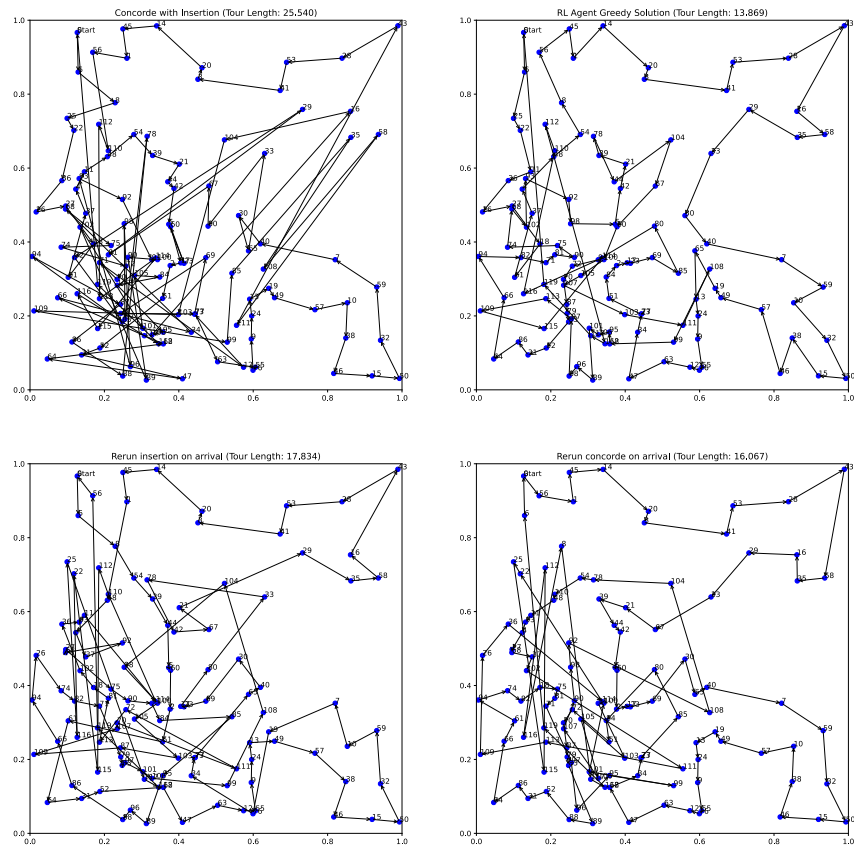

Arrival Times: [2, 3, 4, 6, 7, 8, 12, 13, 18, 20, 21, 24, 25, 27, 28, 29, 33, 34, 35, 40, 41, 43, 45, 46, 49, 52, 53, 54, 55, 59, 60, 63, 64, 66, 68, 69, 71, 72, 74, 78, 79, 81, 82, 83, 84, 85, 86, 87, 90, 92, 94, 98, 101, 102, 109, 112, 114, 116, 117, 118]

Figure 5: 60 static vertices, 60 dynamic vertices, unimodal Distribution.

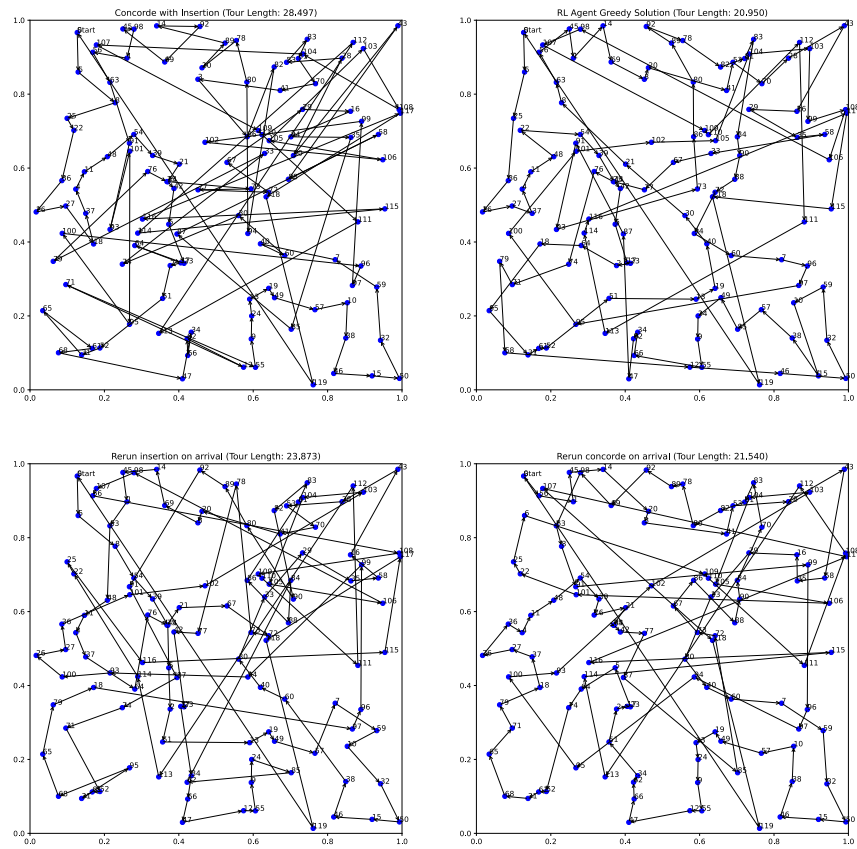

Arrival Times: [2, 3, 4, 11, 15, 16, 19, 23, 27, 31, 32, 33, 34, 35, 40, 41, 45, 49, 51, 52, 58, 59, 61, 62, 63, 64, 65, 66, 67, 69, 70, 71, 72, 78, 80, 81, 83, 85, 86, 89, 91, 92, 97, 99, 100, 101, 102, 104, 105, 107, 108, 109, 110, 111, 112, 114, 115, 116, 118, 119]

Figure 6: 60 static vertices, 60 dynamic vertices, bimodal Distribution.

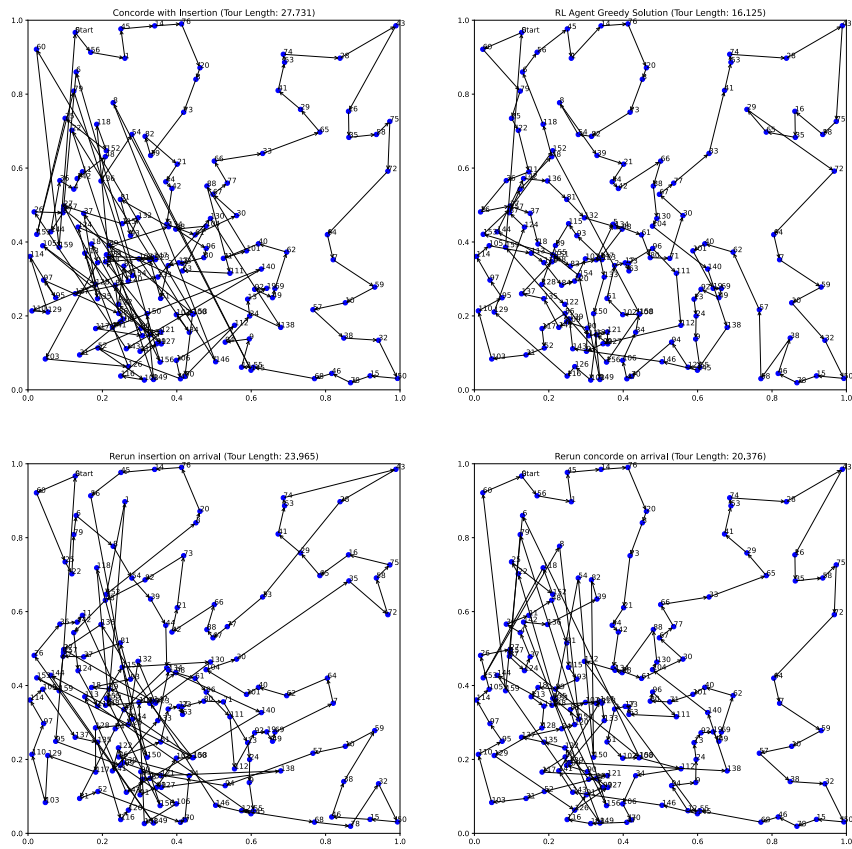

Arrival Times: [2, 3, 4, 5, 7, 8, 16, 17, 23, 26, 28, 29, 30, 31, 32, 33, 34, 36, 37, 38, 40, 43, 44, 45, 46, 47, 50, 53, 54, 55, 57, 59, 61, 64, 65, 69, 70, 72, 73, 78, 79, 80, 84, 86, 87, 88, 91, 92, 95, 96, 98, 99, 103, 105, 107, 108, 110, 112, 113, 120, 122, 124, 125, 126, 129, 130, 131, 134, 135, 137, 142, 144, 146, 149, 151, 152, 153, 155, 156, 158]

Figure 7: 80 static vertices, 80 dynamic vertices, unimodal Distribution.

378  
379  
380  
381  
382  
383  
384  
385  
386  
387  
388  
389  
390  
391  
392  
393  
394  
395  
396  
397  
398  
399  
400  
401  
402  
403  
404  
405  
406  
407  
408  
409  
410  
411  
412  
413  
414  
415  
416  
417  
418  
419  
420  
421  
422  
423  
424  
425  
426  
427  
428  
429  
430  
431

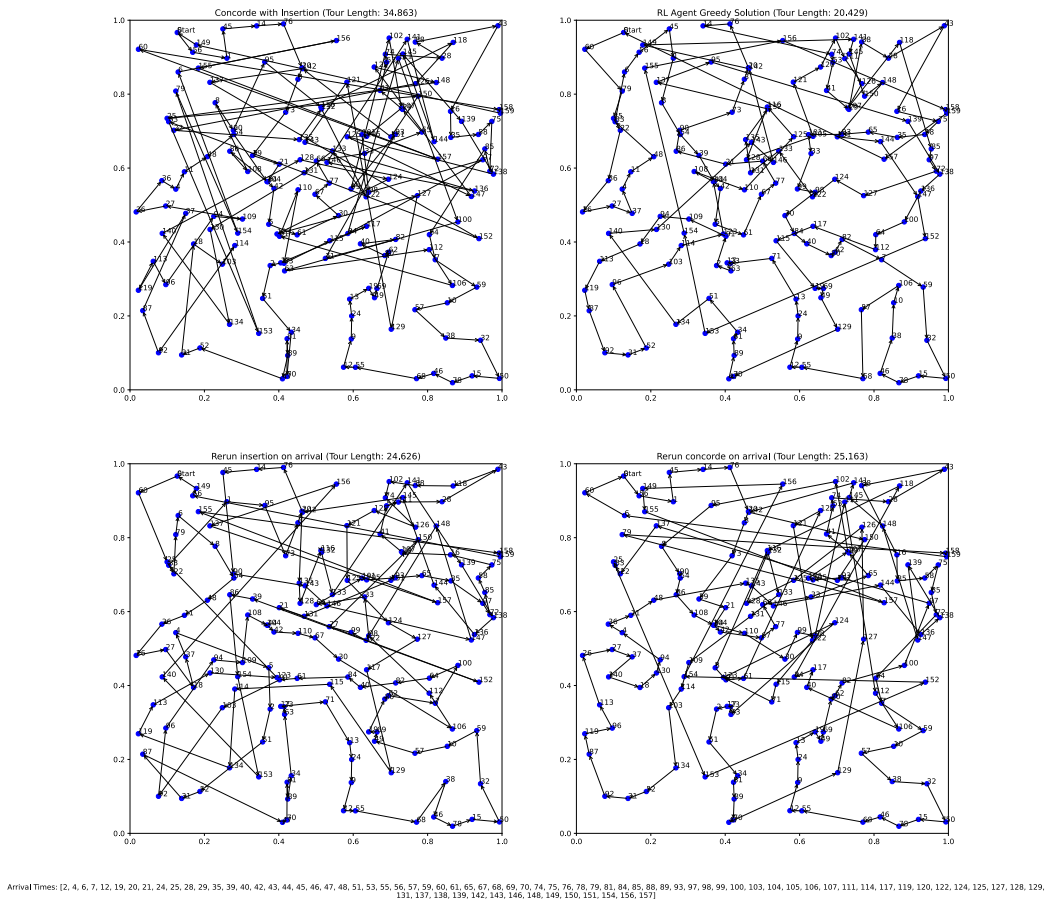

Figure 8: 80 static vertices, 80 dynamic vertices, bimodal Distribution.



432  
433  
434  
435  
436  
437  
438  
439  
440  
441  
442  
443  
444  
445  
446  
447  
448  
449  
450  
451  
452  
453  
454  
455  
456  
457  
458  
459  
460  
461  
462  
463  
464  
465  
466  
467  
468  
469  
470  
471  
472  
473  
474  
475  
476  
477  
478  
479  
480  
481  
482  
483  
484  
485

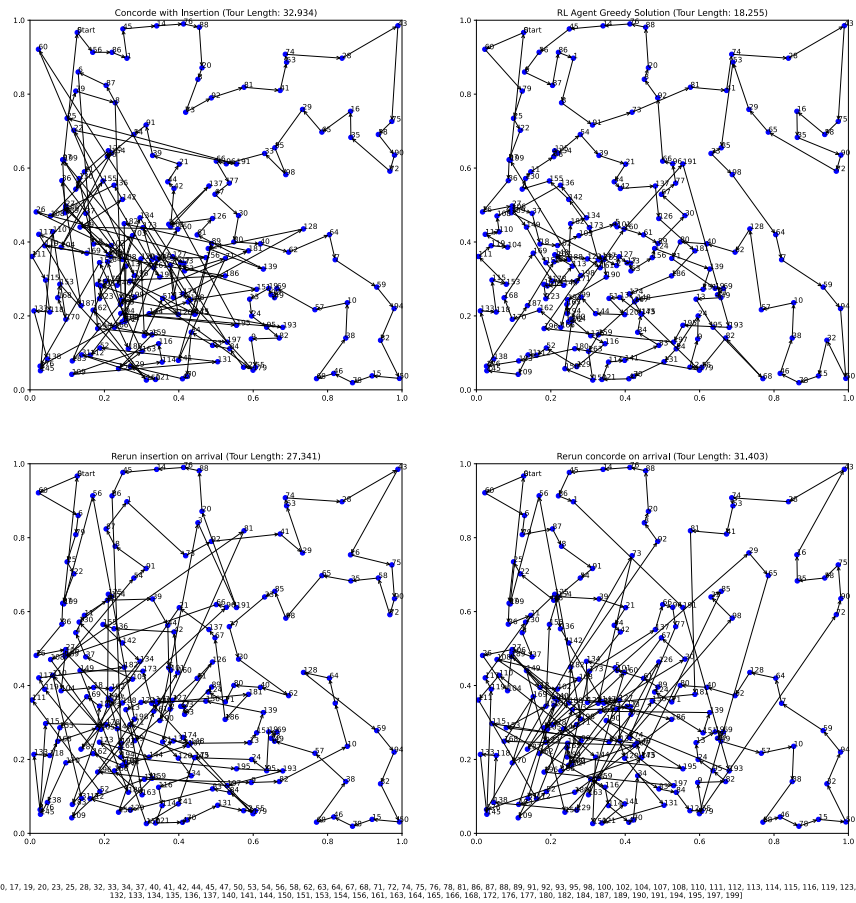

Figure 9: 100 static vertices, 100 dynamic vertices, unimodal Distribution.

486  
487  
488  
489  
490  
491  
492  
493  
494  
495  
496  
497  
498  
499  
500  
501  
502  
503  
504  
505  
506  
507  
508  
509  
510  
511  
512  
513  
514  
515  
516  
517  
518  
519  
520  
521  
522  
523  
524  
525  
526  
527  
528  
529  
530  
531  
532  
533  
534  
535  
536  
537  
538  
539

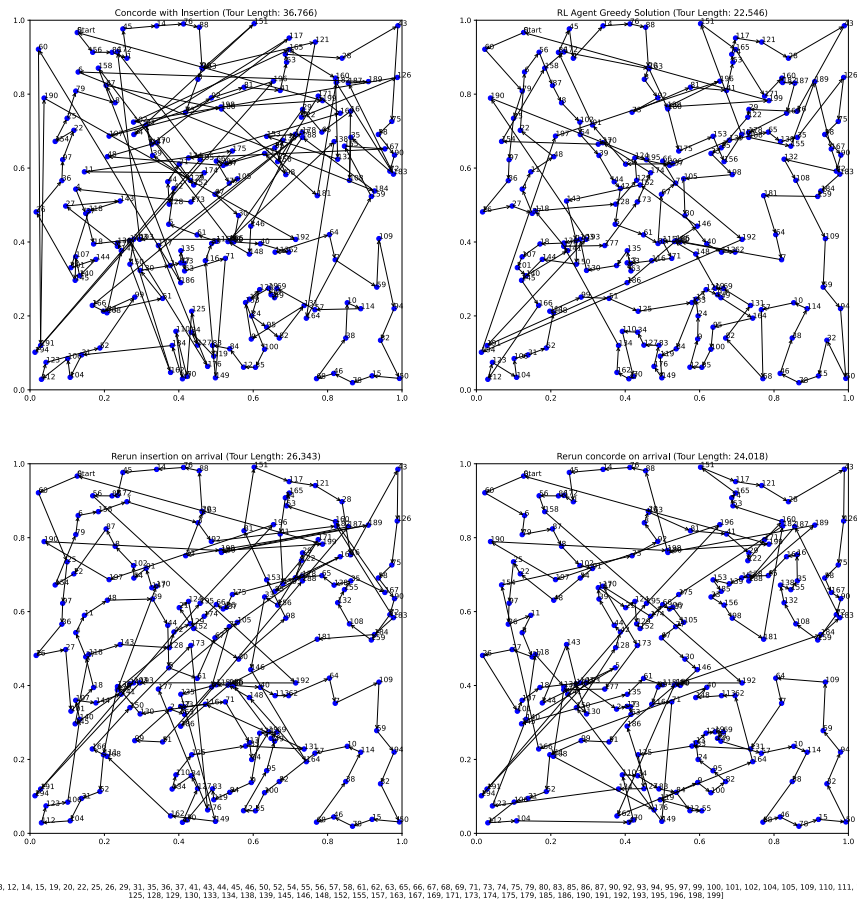

Figure 10: 100 static vertices, 100 dynamic vertices, bimodal Distribution.
